# Supplementary material
Source: PubMed Central journal article supplement (PMC9660511)
Supplement: bcr-2022-251336supp001.pdf [file bcr-2022-251336supp001.pdf]

Supplementary Table 1. Germline mutations which are autosomal dominant in the family and the alternative allele frequency is less than 5% in the general population. Heterozygous and homozygous columns correspond to individuals carrying that mutation.

| chr   | start     | end       | ref                                                               | alt                         | rs_ids                    | gene    | AA change        | Heterozygous        | Homozygous |
|-------|-----------|-----------|-------------------------------------------------------------------|-----------------------------|---------------------------|---------|------------------|---------------------|------------|
| chr8  | 128750539 | 128750540 | A                                                                 | G                           | rs4645959                 | MYC     | N/S              | 2733;2734;2737;2738 |            |
| chr1  | 74670452  | 74670453  | C                                                                 | CTG                         | None                      | FPGT    | A/AX             | 2733;2734;2737;2738 |            |
| chr4  | 187081933 | 187081938 | CCACA                                                             | C                           | rs775521865               | FAM149A |                  | 2733;2734;2737;2738 |            |
| chr7  | 73038471  | 73038473  | AC                                                                | A                           | rs370239468               | MLXIPL  |                  | 2733;2734;2737;2738 |            |
| chr8  | 133855849 | 133855850 | T                                                                 | TTGTG                       | rs71299034                | PHF20L1 |                  | 2733;2734;2737;2738 |            |
| chr8  | 142199005 | 142199006 | C                                                                 | T                           | rs752998857               | DENND3  |                  | 2733;2734;2737;2738 |            |
| chr8  | 143994360 | 143994361 | T                                                                 | A                           | rs4736320                 | GML     |                  | 2733;2734;2737;2738 |            |
| chr9  | 85861558  | 85861559  | C                                                                 | CTT                         | rs145057363<br>rs60787960 | FRMD3   |                  | 2733;2734;2738      | 2737       |
| chr9  | 133224861 | 133224862 | G                                                                 | A                           | rs562785042               | HMCN2   |                  | 2733;2734;2737;2738 |            |
| chr11 | 17548691  | 17548737  | CATGGAGT<br>ACTGCCCT<br>GCTCCCC<br>GCCCTCCC<br>TCCCTCCC<br>ACCGTT | C                           | rs776309514<br>rs55983148 | USH1C   |                  | 2733;2734           | 2737;2738  |
| chr12 | 175967    | 175968    | G                                                                 | C                           | None                      | IQSEC3  |                  | 2733;2734;2738      | 2737       |
| chr12 | 7282907   | 7282909   | CT                                                                | *                           | None                      | None    | None             | 2733;2734;2737;2738 |            |
| chr14 | 95566104  | 95566108  | ACAC                                                              | *                           | None                      | None    | None             | 2733;2734;2737;2738 |            |
| chr16 | 28763731  | 28763732  | C                                                                 | CTT                         | rs200307485               | NPIP9   |                  | 2734;2738           | 2733;2737  |
| chr16 | 74422135  | 74422136  | T                                                                 | C                           | rs62055204                | NPIP15  |                  | 2733;2734           | 2737;2738  |
| chr19 | 30927378  | 30927380  | CA                                                                | C                           | rs34138701<br>rs796967079 | ZNF536  |                  | 2733;2734;2737;2738 |            |
| chr19 | 45911318  | 45911320  | CA                                                                | C                           | rs11314106                | ERCC1   |                  | 2733;2734;2738      | 2737       |
| chr19 | 46299137  | 46299138  | T                                                                 | TCTCCTC<br>GCCCTCC<br>TCCTC | rs773028484<br>rs3217398  | RSPH6A  | -<br>/EEEG<br>EE | 2733;2734;2737;2738 |            |
| chr19 | 49691821  | 49691822  | T                                                                 | C                           | rs909010                  | TRPM4   |                  | 2733;2734;2738      | 2737       |
| chr2  | 79253269  | 79253270  | C                                                                 | T                           | rs760412018               | REG3G   | C                | 2733;2734;2737;2738 |            |
| chr22 | 17622101  | 17622102  | G                                                                 | A                           | rs777126413               | CECR5   | P/L              | 2733;2734;2737;2738 |            |
| chr9  | 130116597 | 130116598 | C                                                                 | G                           | rs750111901               | GARNL3  | F/L              | 2733;2734;2737;2738 |            |
| chr19 | 1119483   | 1119484   | G                                                                 | C                           | None                      | SBNO2   |                  | 2733;2734;2737;2738 |            |

|       |           |           |   |    |             |              |     |                         |      |
|-------|-----------|-----------|---|----|-------------|--------------|-----|-------------------------|------|
| chr16 | 28603815  | 28603816  | A | AG | rs758817175 | SULT1A2      |     | 2733;2734;2737<br>;2738 |      |
| chr1  | 74670355  | 74670356  | G | T  | rs375107941 | FPGT         | D/Y | 2733;2734;2737<br>;2738 |      |
| chr9  | 35380382  | 35380383  | G | A  | rs547751629 | UNC13B       |     | 2733;2734;2738          | 2737 |
| chr9  | 35806620  | 35806621  | C | G  | rs28764014  | NPR2         |     | 2733;2734;2737<br>;2738 |      |
| chr9  | 35842490  | 35842491  | T | C  | rs138973974 | TMEM8B       | L/P | 2733;2734;2737<br>;2738 |      |
| chr14 | 94152864  | 94152865  | T | C  | rs373166841 | UNC79        |     | 2733;2734;2737<br>;2738 |      |
| chr22 | 20458645  | 20458646  | G | A  | rs375185885 | RIMBP3       | R/W | 2733;2734;2737<br>;2738 |      |
| chr10 | 112361764 | 112361765 | G | A  | rs147463420 | SMC3         | K   | 2733;2734;2737<br>;2738 |      |
| chr2  | 88751905  | 88751906  | C | G  | rs550296238 | FOXI3        |     | 2733;2734;2737<br>;2738 |      |
| chr19 | 42916717  | 42916718  | C | A  | rs35387945  | LIPE         |     | 2733;2734;2737<br>;2738 |      |
| chr22 | 19026288  | 19026289  | G | A  | rs113193119 | DGCR2        |     | 2733;2734;2737<br>;2738 |      |
| chr7  | 127950856 | 127950857 | T | C  | rs148028531 | RBM28        | D/G | 2733;2734;2738          | 2737 |
| chr16 | 75688210  | 75688211  | G | A  | rs72563120  | TERF2IP      | E   | 2733;2734;2737<br>;2738 |      |
| chr19 | 45667498  | 45667499  | A | T  | rs142501705 | TRAPPC6<br>A | Y/N | 2733;2734;2737<br>;2738 |      |
| chrX  | 114424342 | 114424343 | G | A  | rs187066706 | RBMXL3       | G   | 2733;2734;2737<br>;2738 |      |
| chr22 | 20302128  | 20302129  | C | T  | rs571530199 | DGCR6L       |     | 2733;2734;2737<br>;2738 |      |
| chr16 | 74443805  | 74443806  | A | G  | rs199894577 | CLEC18B      |     | 2733;2734;2737<br>;2738 |      |
| chr3  | 129104111 | 129104112 | T | C  | rs147296786 | RPL32P3      |     | 2733;2734;2737<br>;2738 |      |
| chr16 | 3274703   | 3274704   | T | C  | rs140076513 | ZNF200       |     | 2733;2734;2737<br>;2738 |      |
| chr10 | 3178791   | 3178792   | C | T  | rs146550313 | PFKP         |     | 2733;2734;2737<br>;2738 |      |
| chr10 | 3111462   | 3111463   | C | T  | rs560826711 | PFKP         |     | 2733;2734;2737<br>;2738 |      |
| chr2  | 99860536  | 99860537  | T | C  | rs34443578  | LYG2         | T/A | 2733;2734;2737<br>;2738 |      |
| chr8  | 145028066 | 145028067 | G | A  | rs188595907 | PLEC         |     | 2733;2734;2737<br>;2738 |      |
| chr16 | 2814949   | 2814950   | C | T  | rs140421601 | SRRM2        | S/F | 2733;2734;2737<br>;2738 |      |
| chr9  | 125377774 | 125377775 | C | T  | rs140000745 | OR1Q1        | G   | 2733;2734;2737<br>;2738 |      |
| chr22 | 24981982  | 24981983  | G | A  | rs41277317  | FAM211B      | L   | 2733;2734;2737<br>;2738 |      |
| chr20 | 60883190  | 60883191  | C | T  | rs45576934  | ADRM1        | A/V | 2733;2734;2738          | 2737 |

|       |           |           |      |   |                           |              |     |                         |           |
|-------|-----------|-----------|------|---|---------------------------|--------------|-----|-------------------------|-----------|
| chr2  | 141232799 | 141232800 | C    | T | rs72899872                | LRP1B        | A/T | 2733;2734;2737<br>;2738 |           |
| chr16 | 1507736   | 1507737   | G    | A | rs117183989               | CLCN7        | S   | 2733;2734;2737<br>;2738 |           |
| chr22 | 25601113  | 25601114  | C    | T | rs117311393               | CRYBB3       |     | 2733;2734;2737<br>;2738 |           |
| chrX  | 123200306 | 123200308 | GT   | G | rs760494042<br>rs34494691 | STAG2        |     | 2733;2734;2737<br>;2738 |           |
| chrX  | 123200312 | 123200314 | AT   | A | rs34397445<br>rs397895899 | STAG2        |     | 2733;2734;2737<br>;2738 |           |
| chr14 | 94567016  | 94567018  | AG   | A | rs138752919               | IFI27L1      |     | 2733;2734;2737<br>;2738 |           |
| chr8  | 144941831 | 144941832 | C    | T | rs143485250               | EPPK1        | V/I | 2733;2734;2737<br>;2738 |           |
| chr2  | 100067841 | 100067842 | C    | T | rs369628255               | REV1         |     | 2733;2734;2737<br>;2738 |           |
| chr8  | 133961212 | 133961213 | T    | A | rs72727436                | TG           |     | 2733;2734;2737<br>;2738 |           |
| chr16 | 71571281  | 71571282  | A    | G | rs117753658               | CHST4        | Q   | 2733;2734;2737<br>;2738 |           |
| chr18 | 10672781  | 10672782  | T    | A | rs34134242                | PIEZO2       | G   | 2733;2734;2737<br>;2738 |           |
| chr9  | 135522271 | 135522272 | T    | C | rs35140383                | DDX31        | T/A | 2733;2734;2737<br>;2738 |           |
| chr14 | 92959939  | 92959940  | G    | A | rs4900130                 | SLC24A4      | V/I | 2733;2734;2737<br>;2738 |           |
| chr14 | 95088800  | 95088801  | A    | G | rs1802958                 | SERPINA3     | T   | 2733;2734;2737<br>;2738 |           |
| chr15 | 66190745  | 66190749  | TTTC | T | rs202093614               | MEGF11       |     | 2733;2734;2738          | 2737      |
| chr19 | 43983665  | 43983666  | G    | A | rs139745869               | PHLDB3       | P/L | 2733;2734;2737<br>;2738 |           |
| chr19 | 45179630  | 45179631  | C    | T | rs76075198                | CEACAM1<br>9 | A   | 2733;2734;2737<br>;2738 |           |
| chr1  | 75602213  | 75602214  | C    | T | rs140903812               | LHX8         |     | 2733;2734;2737<br>;2738 |           |
| chr15 | 66023942  | 66023943  | T    | C | rs118054556               | DENND4A      |     | 2734;2738               | 2733;2737 |
| chr9  | 123675894 | 123675895 | A    | G | rs113495277               | TRAF1        | M/T | 2733;2734;2737<br>;2738 |           |
| chr9  | 125512942 | 125512943 | C    | T | rs117703463               | OR1L6        | R/W | 2733;2734;2737<br>;2738 |           |
| chr9  | 135982492 | 135982493 | C    | T | rs45487303                | RALGDS       | E   | 2733;2734;2737<br>;2738 |           |
| chr16 | 1498500   | 1498501   | G    | A | rs41292291                | CLCN7        |     | 2733;2734;2737<br>;2738 |           |
| chr9  | 133298198 | 133298199 | C    | T | rs11793331                | HMCN2        |     | 2733;2734;2737<br>;2738 |           |
| chr8  | 145639599 | 145639600 | A    | G | rs111355160               | SLC39A4      |     | 2733;2734;2737<br>;2738 |           |
| chr18 | 9887492   | 9887493   | T    | C | rs140680585               | TXNDC2       | P   | 2733;2734;2737<br>;2738 |           |
| chr14 | 94430877  | 94430878  | G    | A | rs11621009                | ASB2         | T/M | 2733;2734;2737<br>;2738 |           |

|       |           |           |   |    |                           |                |     |                         |      |
|-------|-----------|-----------|---|----|---------------------------|----------------|-----|-------------------------|------|
| chr16 | 2223141   | 2223142   | G | A  | rs117921232               | TRAF7          |     | 2733;2734;2737<br>;2738 |      |
| chr22 | 26861969  | 26861970  | G | A  | rs6005054                 | HPS4           |     | 2733;2734;2737<br>;2738 |      |
| chr2  | 95542432  | 95542433  | C | G  | rs17120062                | TEKT4          | N/K | 2733;2734;2737<br>;2738 |      |
| chr22 | 25961138  | 25961139  | G | A  | rs142053917               | ADRBK2         |     | 2733;2734;2737<br>;2738 |      |
| chr16 | 73161197  | 73161198  | G | A  | rs72795194                | C16orf47       |     | 2733;2734;2737<br>;2738 |      |
| chr9  | 130674501 | 130674502 | G | A  | rs147508246               | ST6GALN<br>AC4 |     | 2733;2734;2737<br>;2738 |      |
| chr9  | 136219061 | 136219062 | T | A  | rs183853102               | SURF1          |     | 2733;2734;2737<br>;2738 |      |
| chr10 | 3159005   | 3159006   | C | T  | rs61755068                | PFKP           | T   | 2733;2734;2738          | 2737 |
| chr2  | 132290732 | 132290733 | A | G  | rs140316434<br>rs2621984  | CCDC74A        |     | 2733;2734;2737<br>;2738 |      |
| chr14 | 95085706  | 95085707  | C | T  | rs61737404                | SERPINA3       | S   | 2733;2734;2737<br>;2738 |      |
| chr22 | 19512391  | 19512392  | A | AG | rs565278621<br>rs55684292 | CLDN5          |     | 2733;2734;2737<br>;2738 |      |
| chr3  | 122437900 | 122437901 | A | G  | rs115027980               | PARP14         |     | 2733;2734;2738          | 2737 |
| chr3  | 122591229 | 122591230 | G | A  | rs147365074               | DIRC2          |     | 2733;2734;2737<br>;2738 |      |
| chr10 | 1717176   | 1717177   | G | T  | rs4880528                 | ADARB2         |     | 2733;2734;2737<br>;2738 |      |
| chr19 | 45649370  | 45649371  | C | A  | rs118054030               | PPP1R37        |     | 2733;2734;2737<br>;2738 |      |
